# Supplementary material for: Pyrophosphate-Dependent ATP Formation from Acetyl Coenzyme A in Syntrophus aciditrophicus, a New Twist on ATP Formation
Source: PubMed Central journal article supplement (PMC4992975; doi:10.1128/mbio.01208-16), 2016-08-16

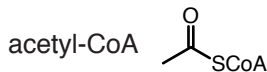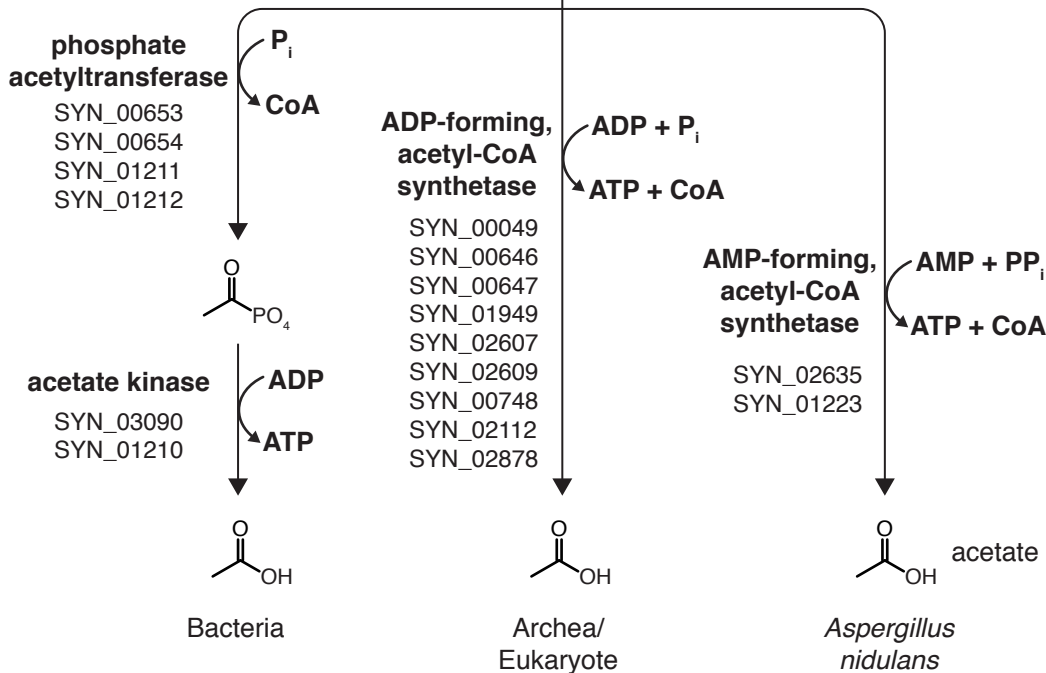

Supplement: mbo004162932sf1.pdf [file mbo004162932sf1.pdf]
