# Supplementary material for: Pyrophosphate-Dependent ATP Formation from Acetyl Coenzyme A in Syntrophus aciditrophicus, a New Twist on ATP Formation
Source: PubMed Central journal article supplement (PMC4992975; doi:10.1128/mbio.01208-16), 2016-08-16
Supplement: mbo004162932sf2.pdf [file mbo004162932sf2.pdf]

315 GWV TGH SYVVY GPLALGATS IMFEGV P NYPTYSRFWQVVEKYKVT SFYTAPT AIRAIAKE  
338 GWI TGH SYVVY GPLCNGATSVLFESTPVYPNAGRYWETVERL KINQFYGAPTAVRLL LKY  
257 GWV TGT VYGI FAPWLN GATNVI VGGRF ---SPESWYGTIEQLGVNVWYSAPTA FRMLMGA  
308 GWV TGH SYLLY GPLACGAT TLMFEGV P NWPTPARMAQVVDK HQVNILYTAPT AIRALMAE  
326 GWI TGH TYVVY APLL LGCSTV VFE S TPAYPDFSRYW DVI EKHKVTQFYVAPTALRLLKRA  
332 GWV TGH SYIVY APLI LGMTSLMYEGAADYPDFGRW WKNIQDHKVTVLYTAPTAVR MFMKQ  
308 GWV TGH SYLLY GPLACGAT TLMFEGV P NWPTPARMCQVVDK HQVNILYTAPT AIRALMAE

374 WP\_011418543 **Syntrophus aciditrophicus**  
397 Q9NUB1 *Homo sapiens*  
313 P39062 *Bacillus subtilis*  
367 P27550 *Escherichia coli* K12  
385 P16928 *Aspergillus nidulans*  
391 P27095 *Methanosaeta concilii*  
367 Q8ZKF6 *Salmonella typhimurium*

375 GDEWLK GIDLSSLRVLSSV GEPLNPEAWQWFYEKIGNSQCP IVDTWQ TETGGHMILPLP  
398 GDAWVK KYDRSSLR TLG SV GEPINCEAWEWLHRVVGDSRCTLV DTTWQ TETGGICIA PRP  
314 GDEMAA KYDLTSLRHVLSV GEPLNPEVIRWGHKVFNK ---RIH DTTWMT ETGSQLICNYP  
368 GDKAIEG TDRSSLRILG SV GEPINPEAW EWYWK KIGNEKCPVV DTTWQ TETGGFMITPLP  
386 GDH HHH-KMEHL RVLG SV GEP IAAEVWK WYFEKVGKEEAHIC DTYWQ TETGSNVITPLA  
392 GAEPDKY DLSSLRLLG SV GEPINPEAW M WYREHIGRGELQIM DTTWQ TETGTFLNSPLP  
368 GDKAIEG TDRSSLRILG SV GEPINPEAW EWYWK KIGKEKCPVV DTTWQ TETGGFMITPLP

434 WP\_011418543 **Syntrophus aciditrophicus**  
457 Q9NUB1 *Homo sapiens*  
370 P39062 *Bacillus subtilis*  
427 P27550 *Escherichia coli* K12  
444 P16928 *Aspergillus nidulans*  
451 P27095 *Methanosaeta concilii*  
427 Q8ZKF6 *Salmonella typhimurium*

435 GA--IDIKPAK PALPIMGVIPTLVDDQTG EELKNMEANGALCFKTA WPGITRTIYGDH KR  
458 SEEGAEILPAMAMR PFFGIVPVLMD EKGSV-VEGSNVSGALCISQAWPGMARTIYGDHQR  
371 C---MDIKPGS MGKPIPGVEAAIVDNQGNELP--PYRMGN LAIKKGWPSMHTIWN NPEK  
428 GA--TELKAGSATR PFFGVQPALVDNEG NP-L-EGATEGSLVITDSWPGQARTLFGDHER  
445 GV--TPTKPGSASL PFFGIEPAI IDPVS GEEISGNDVEGVLAFKQPWPSMARTVWGAH KR  
452 I---TPLKPGSCTF PPLPGYDISILDEEGNEVP--LGSGGNIVAL KPYP SMLRAFWDKER  
428 GA--IELKAGSATR PFFGVQPALVDNEGHP-Q-EGATEGNLVITDSWPGQARTLFGDHER

492 WP\_011418543 **Syntrophus aciditrophicus**  
516 Q9NUB1 *Homo sapiens*  
425 P39062 *Bacillus subtilis*  
483 P27550 *Escherichia coli* K12  
502 P16928 *Aspergillus nidulans*  
506 P27095 *Methanosaeta concilii*  
483 Q8ZKF6 *Salmonella typhimurium*

493 YEETYFEPY-----PGNYFSGD GALRDKDGYRITGR IDDVINVS GH R MGTA EIEATLN  
517 FVDAYFKAY-----PGYYFTGD GAYRTEGGYYQITGR MDDVINI S GHRLGTAEIEDAIA  
426 YESYFMP-----GGWYVSGD SAYMDEEGYFWFQGR VDDVIMT S GERVGPFEVESKLV  
484 FEQTYFSTF-----KNMYFSGD GARRDEDGYYWITGR VDDVLNV S GHRLGTAEIESALV  
503 YMDTYLNVY-----KGYFTGD GAGR DHEGYWIRGR VDDVVNV S GHRLSTAEIEAALI  
507 FMKEYWQFYWDVPGRRGVYLAGD KAQRDKDGYFFIQGR IDDVLSVAGHR IANAEEVESALV  
484 FEQTYFSTF-----KNMYFSGD GARRDEDGYYWITGR VDDVLNV S GHRLGTAEIESALV

546 WP\_011418543 **Syntrophus aciditrophicus**  
570 Q9NUB1 *Homo sapiens*  
477 P39062 *Bacillus subtilis*  
537 P27550 *Escherichia coli* K12  
556 P16928 *Aspergillus nidulans*  
566 P27095 *Methanosaeta concilii*  
537 Q8ZKF6 *Salmonella typhimurium*

547 AHEKVAESA VVGYPHEVKGQSIYAYITLKTGFEPSEDLKKELTQYVRTIIGPIATPEKIQ  
571 DHPAVPESA VIGYPHDIKGEAAFAFIVVKDSAGDSV VVQELKSMVATKI AKYAVPDEIL  
478 EHPAIAEAGVIGKPD PVRGEI I KAFIALREGFEP S DKLKEEIRLFV KQGLAAHAAPREIE  
538 AHPKIAEAAVVGIPHNI KGQAIYAYVTLNHGEEPSPELYAEVRNWVRKEIGPLATPDVLH  
557 EHPMVAEAAVVGIADEL TGQAVNAFVSLKEGNETNDQVRKDLILQVRK SIGPFAAPKAVF  
567 AHPKIAEAAVVGKPD E VKGESIVAFVILRVGNEPSPELAKDAIAFV RKTLPVAAPTEVH  
538 AHPKIAEAAVVGIPHAIKGQAIYAYVTLNHGEEPSPELYAEVRNWVRKEIGPLATPDVLH

606 WP\_011418543 **Syntrophus aciditrophicus**  
630 Q9NUB1 *Homo sapiens*  
537 P39062 *Bacillus subtilis*  
597 P27550 *Escherichia coli* K12  
616 P16928 *Aspergillus nidulans*  
626 P27095 *Methanosaeta concilii*  
597 Q8ZKF6 *Salmonella typhimurium*
